# Supplementary material for: Computer-aided autism diagnosis based on visual attention models using eye tracking
Source: Springer Nature journal article supplement (doi:10.1038/s41598-021-89023-8), 2021-05-12
Supplement: 41598_2021_89023_MOESM1_ESM.pdf [file 41598_2021_89023_MOESM1_ESM.pdf]

# Computer-aided autism diagnosis based on visual attention models using eye tracking

**Jessica S. Oliveira<sup>1</sup>, Felipe O. Franco<sup>2,3</sup>, Mirian C. Revers<sup>2</sup>, Andréia F. Silva<sup>2</sup>, Joana Portolese<sup>2</sup>, Helena Brentani<sup>2</sup>, Ariane Machado-Lima<sup>1</sup>, and Fátima L. S. Nunes<sup>1,\*</sup>**

<sup>1</sup>School of Arts, Sciences and Humanities (EACH), University of Sao Paulo (USP), Sao Paulo-SP, zip code 03828-000, Brazil

<sup>2</sup>Department of Psychiatry, University of Sao Paulo's School of Medicine (FMUSP), Sao Paulo-SP, zip code 05403-903, Brazil

<sup>3</sup>Interunit PostGraduate Program on Bioinformatics, Institute of Mathematics and Statistics (IME), University of Sao Paulo (USP), Sao Paulo-SP, zip code 05508-090, Brazil

| Number | ID | Sex | Age | WISC | RBS | CARS | VTS | VC  | VDL | VS | VL  | Pharmacoterapy                |
|--------|----|-----|-----|------|-----|------|-----|-----|-----|----|-----|-------------------------------|
| 1      | 1  | M   | 10  | 154  | 6   | 33   | -   | -   | -   | -  | -   | Lisdexamfetamine              |
| 2      | 2  | M   | 16  | 85   | 26  | 30   | -   | -   | -   | -  | -   | Risperidone, CBZ              |
| 3      | 3  | M   | 6   | 132  | 9   | 30   | 95  | 116 | 100 | 97 | 72  | Risperidone, CBZ              |
| 4      | 4  | M   | 13  | 131  | 25  | 32.5 | 66  | 63  | 74  | 65 | 100 | Methylphenidate               |
| 5      | 5  | F   | 7   | 68   | 20  | 38   | 66  | 65  | 59  | 75 | 59  | Not                           |
| 6      | 6  | M   | 10  | -    | -   | -    | -   | -   | -   | -  | -   | -                             |
| 7      | 7  | M   | 15  | 48   | 18  | 33.5 | 52  | 45  | 61  | 49 | 78  | Risperidone                   |
| 8      | 9  | M   | 15  | 54   | 21  | 39.5 | 54  | 53  | 54  | 55 | 56  | Risperidone                   |
| 9      | 10 | M   | 4   | -    | 9   | 31   | -   | -   | -   | -  | -   | Not                           |
| 10     | 11 | F   | 3   | -    | 16  | 42   | 44  | 38  | 41  | 53 | 54  | Risperidone, Vitamin-D        |
| 11     | 12 | M   | 4   | -    | 9   | 30   | -   | -   | -   | -  | -   | -                             |
| 12     | 13 | M   | 3   | -    | 45  | 36.5 | -   | -   | -   | -  | -   | Not                           |
| 13     | 14 | M   | 15  | 62   | 53  | 40   | 64  | 62  | 65  | 70 | 91  | Risperidone                   |
| 14     | 15 | F   | 8   | 62   | 22  | 34   | 64  | 69  | 69  | 59 | 84  | Fluoxetine                    |
| 15     | 16 | F   | 9   | 62   | 1   | 32   | 85  | 74  | 102 | 85 | 91  | Methylphenidate               |
| 16     | 17 | F   | 4   | -    | 51  | 35   | 57  | 52  | 64  | 61 | 61  | -                             |
| 17     | 18 | F   | 12  | -    | 36  | 39   | 44  | 45  | 40  | 49 | 64  | N-acetylcysteine, Lamotrigine |
| 18     | 19 | M   | 9   | -    | -   | 44   | -   | -   | -   | -  | -   | -                             |
| 19     | 20 | M   | 4   | -    | 26  | 36   | -   | -   | -   | -  | -   | Not                           |
| 20     | 21 | M   | 6   | -    | 38  | 34.5 | 61  | 57  | 66  | 61 | 70  | Not                           |
| 21     | 22 | M   | 8   | -    | -   | 34   | -   | -   | -   | -  | -   | -                             |
| 22     | 23 | F   | 4   | -    | 21  | 30   | 57  | 57  | 60  | 53 | 67  | Not                           |
| 23     | 24 | M   | 12  | 88   | 14  | 31.5 | 77  | 81  | 73  | 85 | 97  | Methylphenidate               |
| 24     | 25 | F   | 11  | 126  | 20  | 31   | 76  | 81  | 78  | 75 | 84  | Escitalopram                  |
| 25     | 26 | M   | 13  | 71   | 83  | 35.5 | 57  | 57  | 69  | 46 | 75  | CBZ, Risperidone, Neuleptil   |
| 26     | 27 | F   | 10  | 77   | 3   | 30.5 | 72  | 67  | 69  | 85 | 107 | Neuleptil                     |
| 27     | 28 | M   | 11  | -    | 12  | 30   | 60  | 56  | 63  | 64 | 104 | Not                           |
| 28     | 29 | M   | 13  | 83   | 25  | 34   | 62  | 62  | 62  | 67 | 100 | Risperidone, Methylphenidate  |
| 29     | 30 | F   | 6   | -    | 23  | 32   | 57  | 48  | 57  | 62 | 64  | Not                           |
| 30     | 31 | M   | -   | -    | -   | -    | -   | -   | -   | -  | -   | -                             |
| 31     | 32 | M   | 11  | 100  | 17  | 30.5 | 64  | 65  | 69  | 64 | 104 | Not                           |
| 32     | 33 | M   | 7   | 85   | 62  | 35   | 61  | 62  | 62  | 57 | 75  | Aripiprazole, Neuleptil;      |
| 33     | 34 | M   | -   | -    | -   | -    | -   | -   | -   | -  | -   | -                             |
| 34     | 35 | F   | 7   | -    | 45  | 36   | 61  | 53  | 62  | 66 | 59  | Not                           |
| 35     | 36 | M   | 10  | 146  | 20  | 30   | 67  | 65  | 71  | 71 | 84  | OxCBZ                         |
| 36     | 37 | F   | 14  | -    | 26  | 37.5 | 45  | 45  | 48  | 45 | 61  | Not                           |
| 37     | 38 | F   | 9   | 77   | 56  | 30.5 | 66  | 81  | 61  | 62 | 67  | Not                           |
| 38     | 39 | M   | 3   | -    | 64  | 36   | 53  | 49  | 60  | 53 | 59  | Not                           |
| 39     | 40 | M   | 8   | 115  | 30  | 30.5 | 64  | 69  | 63  | 64 | 70  | Fluoxetine                    |
| 40     | 41 | F   | 4   | -    | 38  | 32.5 | 60  | 57  | 64  | 61 | 67  | Risperidone, Neuleptil;       |
| 41     | 42 | M   | 11  | 80   | 7   | 35   | 63  | 62  | 66  | 64 | 88  | Not                           |
| 42     | 43 | M   | 10  | 80   | 11  | 34   | 56  | 62  | 61  | 45 | 75  | Fluoxetine, Methylphenidate   |
| 43     | 45 | F   | -   | -    | 26  | 38   | -   | -   | -   | -  | -   | -                             |
| 44     | 46 | M   | 10  | 68   | 56  | 33   | 62  | 64  | 59  | 66 | 78  | Haloperidol                   |
| 45     | 48 | M   | 9   | 77   | 11  | 36.5 | 55  | 47  | 61  | 57 | 78  | Not                           |
| 46     | 49 | M   | 10  | 54   | 32  | 37   | 57  | 62  | 61  | 48 | 72  | Not                           |
| 47     | 50 | M   | 10  | 71   | 30  | 34.5 | 62  | 64  | 59  | 68 | 107 | Risperidone                   |
| 48     | 51 | F   | 7   | -    | 22  | 45   | 50  | 50  | 51  | 38 | 91  | Clonidine                     |
| 49     | 52 | F   | 11  | -    | 45  | 41   | 47  | 54  | 51  | 38 | 91  | Sertraline, Topiramate        |
| 50     | 53 | M   | 11  | 97   | 30  | 31   | 63  | 69  | 62  | 62 | 88  | Risperidone, Omega-3          |
| 51     | 54 | M   | 5   | -    | 21  | 37   | 57  | 49  | 66  | 61 | 64  | Not                           |
| 52     | 55 | M   | 12  | -    | 18  | 42   | 39  | 38  | 40  | 45 | 59  | Fluoxetine                    |
| 53     | 56 | F   | 7   | 132  | 12  | 30.5 | 79  | 86  | 76  | 80 | 78  | Risperidone, Methylphenidate  |
| 54     | 57 | M   | 4   | 71   | 41  | 37   | 65  | 67  | 68  | 66 | 84  | Clobazam, CBZ, Risperidone    |
| 55     | 58 | M   | 8   | -    | 59  | 35.5 | 61  | 62  | 59  | 61 | 57  | Fluoxetine, Neuleptil         |
| 56     | 59 | M   | 11  | 80   | 19  | 32   | 60  | 61  | 57  | 66 | 88  | Not                           |
| 57     | 60 | M   | 9   | 87   | 17  | 33   | 78  | 67  | 97  | 76 | 104 | Risperidone                   |
| 58     | 63 | M   | 9   | -    | 25  | 31   | 54  | 53  | 55  | 53 | 81  | Not                           |

| Number | ID  | Sex | Age | WISC | RBS  | CARS | VTS  | VC   | VDL  | VS   | VL   | Pharmacotherapy                 |
|--------|-----|-----|-----|------|------|------|------|------|------|------|------|---------------------------------|
| 59     | 64  | F   | 8   | -    | 15   | 33.5 | 58   | 56   | 68   | 51   | 67   | Risperidone, Topiramate         |
| 60     | 65  | F   | 12  | 94   | 49   | 32.5 | 69   | 74   | 74   | 64   | 81   | Risperidone, MEL                |
| 61     | 66  | M   | 11  | -    | 16   | 40.5 | 51   | 48   | 51   | 53   | 67   | CBZ                             |
| 62     | 67  | M   | 11  | 83   | 40   | 37   | 68   | 64   | 83   | 62   | 100  | Risperidone                     |
| 63     | 68  | M   | 10  | -    | 80   | 44.5 | 41   | 38   | 51   | 38   | 59   | Risperidone                     |
| 64     | 69  | M   | 8   | 117  | 42   | 30.5 | 64   | 65   | 66   | 66   | 84   | Risperidone                     |
| 65     | 71  | F   | 10  | 97   | 67   | 38.5 | 60   | 61   | 61   | 62   | 94   | Risperidone, Methylphenidate    |
| 66     | 72  | F   | 3   | -    | 18   | 32.5 | 64   | 67   | 66   | 65   | 72   | Not                             |
| 67     | 73  | F   | 11  | -    | 26   | 42   | 35   | 34   | 43   | 36   | 56   | Risperidone, Sertraline         |
| 68     | 74  | F   | 5   | -    | -    | -    | -    | -    | -    | -    | -    | -                               |
| 69     | 75  | F   | 5   | -    | 30   | 39   | 58   | 69   | 62   | 51   | 61   | MEL                             |
| 70     | 77  | F   | 4   | -    | 58   | 38   | 69   | 69   | 83   | 77   | 59   | Risperidone                     |
| 71     | 78  | F   | 5   | -    | 39   | 35.5 | 55   | 57   | 55   | 59   | 61   | MEL                             |
| 72     | 107 | M   | 18  | -    | -    | -    | -    | -    | -    | -    | -    | -                               |
| 73     | 108 | M   | 18  | -    | -    | -    | -    | -    | -    | -    | -    | -                               |
| 74     | 109 | M   | 6   | -    | -    | -    | -    | -    | -    | -    | -    | -                               |
| 75     | 110 | M   | 10  | -    | -    | -    | -    | -    | -    | -    | -    | Fluoxetine, VPA, MEL, Neuleptil |
| 76     | 111 | M   | 3   | -    | -    | -    | -    | -    | -    | -    | -    | -                               |
| Mean   | -   | -   | 8.8 | 89   | 30   | 35   | 60.5 | 60.6 | 63.8 | 61   | 77   | -                               |
| SD     | -   | -   | 3.7 | 27.1 | 18.7 | 4    | 10.7 | 13.4 | 12.6 | 12.6 | 15.5 | -                               |
| Median | -   | -   | 9   | 83   | 25   | 34.5 | 61   | 62   | 62   | 62   | 75   | -                               |

**Supplementary Table S1.** Clinical information of ASD individuals. Age is expressed in years. Abbreviations: ID, Project Identification Number; WISC, Wechsler Intelligence Scale for Children; RBS, Repetitive Behavior Scale; CARS, Childhood Autism Rating Scale; VTS, Vineland Total Score; VC, Vineland Communication; VDL, Vineland Daily Living; VS, Vineland Socialization; VL, Vineland Locomotion; CBZ, Carbamazepine; VPA, Valproic Acid; MEL, Melatonin.
